# Supplementary material for: Reducing MoS2 FET contact resistance by stepped annealing to optimize device performance
Source: Royal Society of Chemistry journal article supplement (doi:10.1039/d4tc04669b), 2025-01-01
Supplement: d4tc04669b1.pdf [file d4tc04669b1.pdf]

## Supplementary Information

# Reducing MoS<sub>2</sub> FET contact resistance by stepped annealing to optimize device performance

Peng Liu,<sup>†a</sup> Xin Lin,<sup>†b</sup> Zewen Li,<sup>b</sup> Dianyou Song,<sup>\*a</sup> Fang Wang,<sup>\*a</sup> Yan Cheng,<sup>c</sup> Sannian Song<sup>d</sup> and Kailiang Zhang<sup>\*a</sup>

*a Tianjin Key Laboratory of Film Electronic & Communication Devices, School of Integrated Circuit Science and Engineering, Tianjin University of Technology, Tianjin 300384, China.*

*b School of Materials Science and Engineering, Tianjin University of Technology, Tianjin 300384, China.*

*c Key Laboratory of Polar Materials and Devices (MOE), Department of Electronics, East China Normal University, Shanghai 200241, China.*

*d Shanghai Institute of Microsystem and Information Technology, Chinese Academy of Sciences, Shanghai 200050, China.*

Corresponding authors

E-mail address: [youdiansong@163.com](mailto:youdiansong@163.com)(Dianyou Song), [fwang75@163.com](mailto:fwang75@163.com)(Fang Wang), [kailiang\\_zhang2007@163.com](mailto:kailiang_zhang2007@163.com)(Kailiang Zhang).

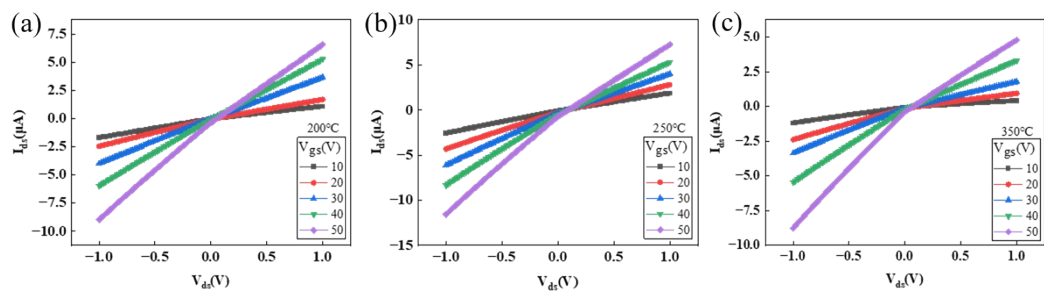

**Fig S1.** Output characteristics of the MoS<sub>2</sub> FET at varying  $V_{gs}$  after annealing at (a) 200°C (b) 250°C (c) 350°C.

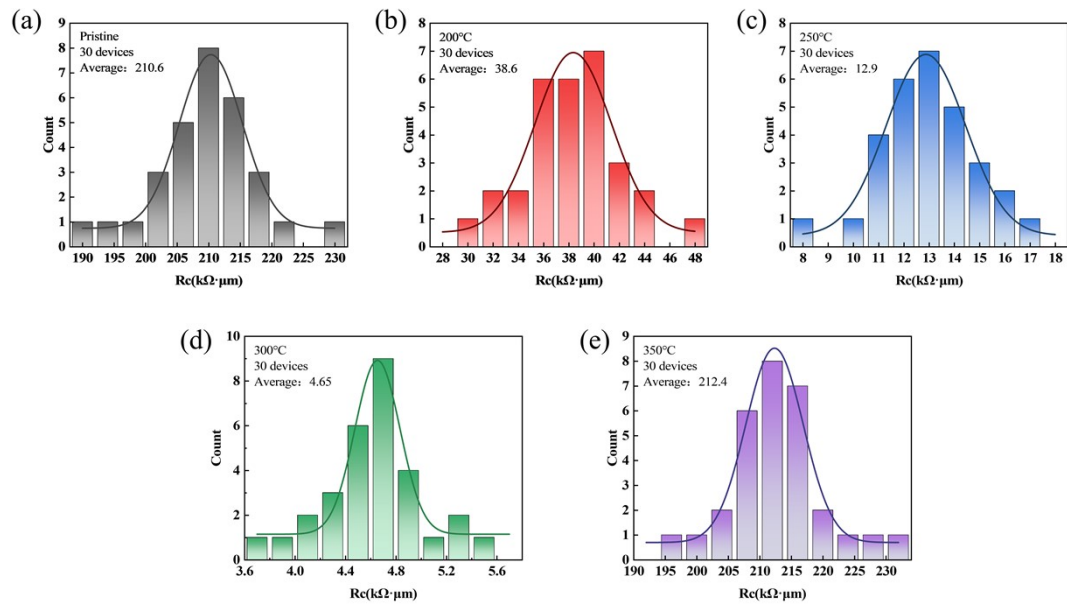

**Fig S2.** The statistical results of contact resistance of 30 devices (a) before annealing and after annealing at (b) 200°C, (c) 250°C, (d) 300°C, (e) 350°C.

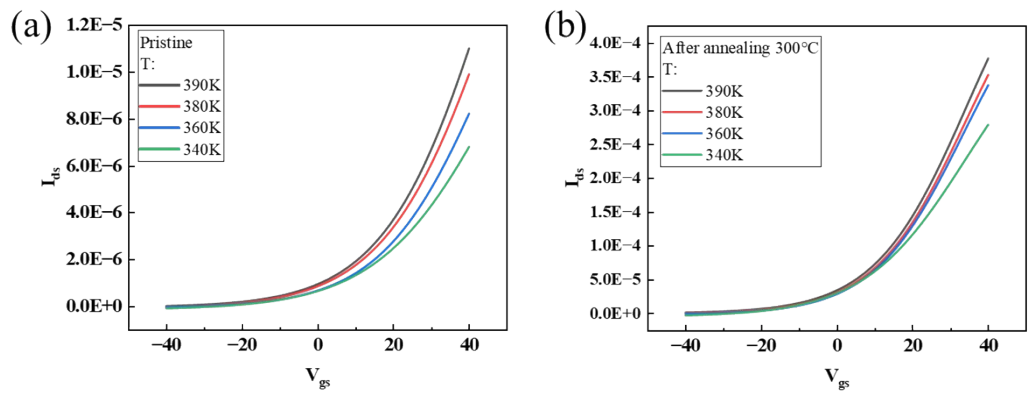

**Fig S3.** Transfer characteristic curves of MoS<sub>2</sub> FETs (a) before and (b) after 300°C annealing at different operating temperatures.
